# Supplementary material for: A Resource of Quantitative Functional Annotation for Homo sapiens Genes
Source: PubMed Central journal article supplement (PMC3284330; doi:10.1534/g3.111.000828), 2012-02-01
Supplement: supp_2.2.223_000828SI.pdf [file supp_2.2.223_000828SI.pdf]

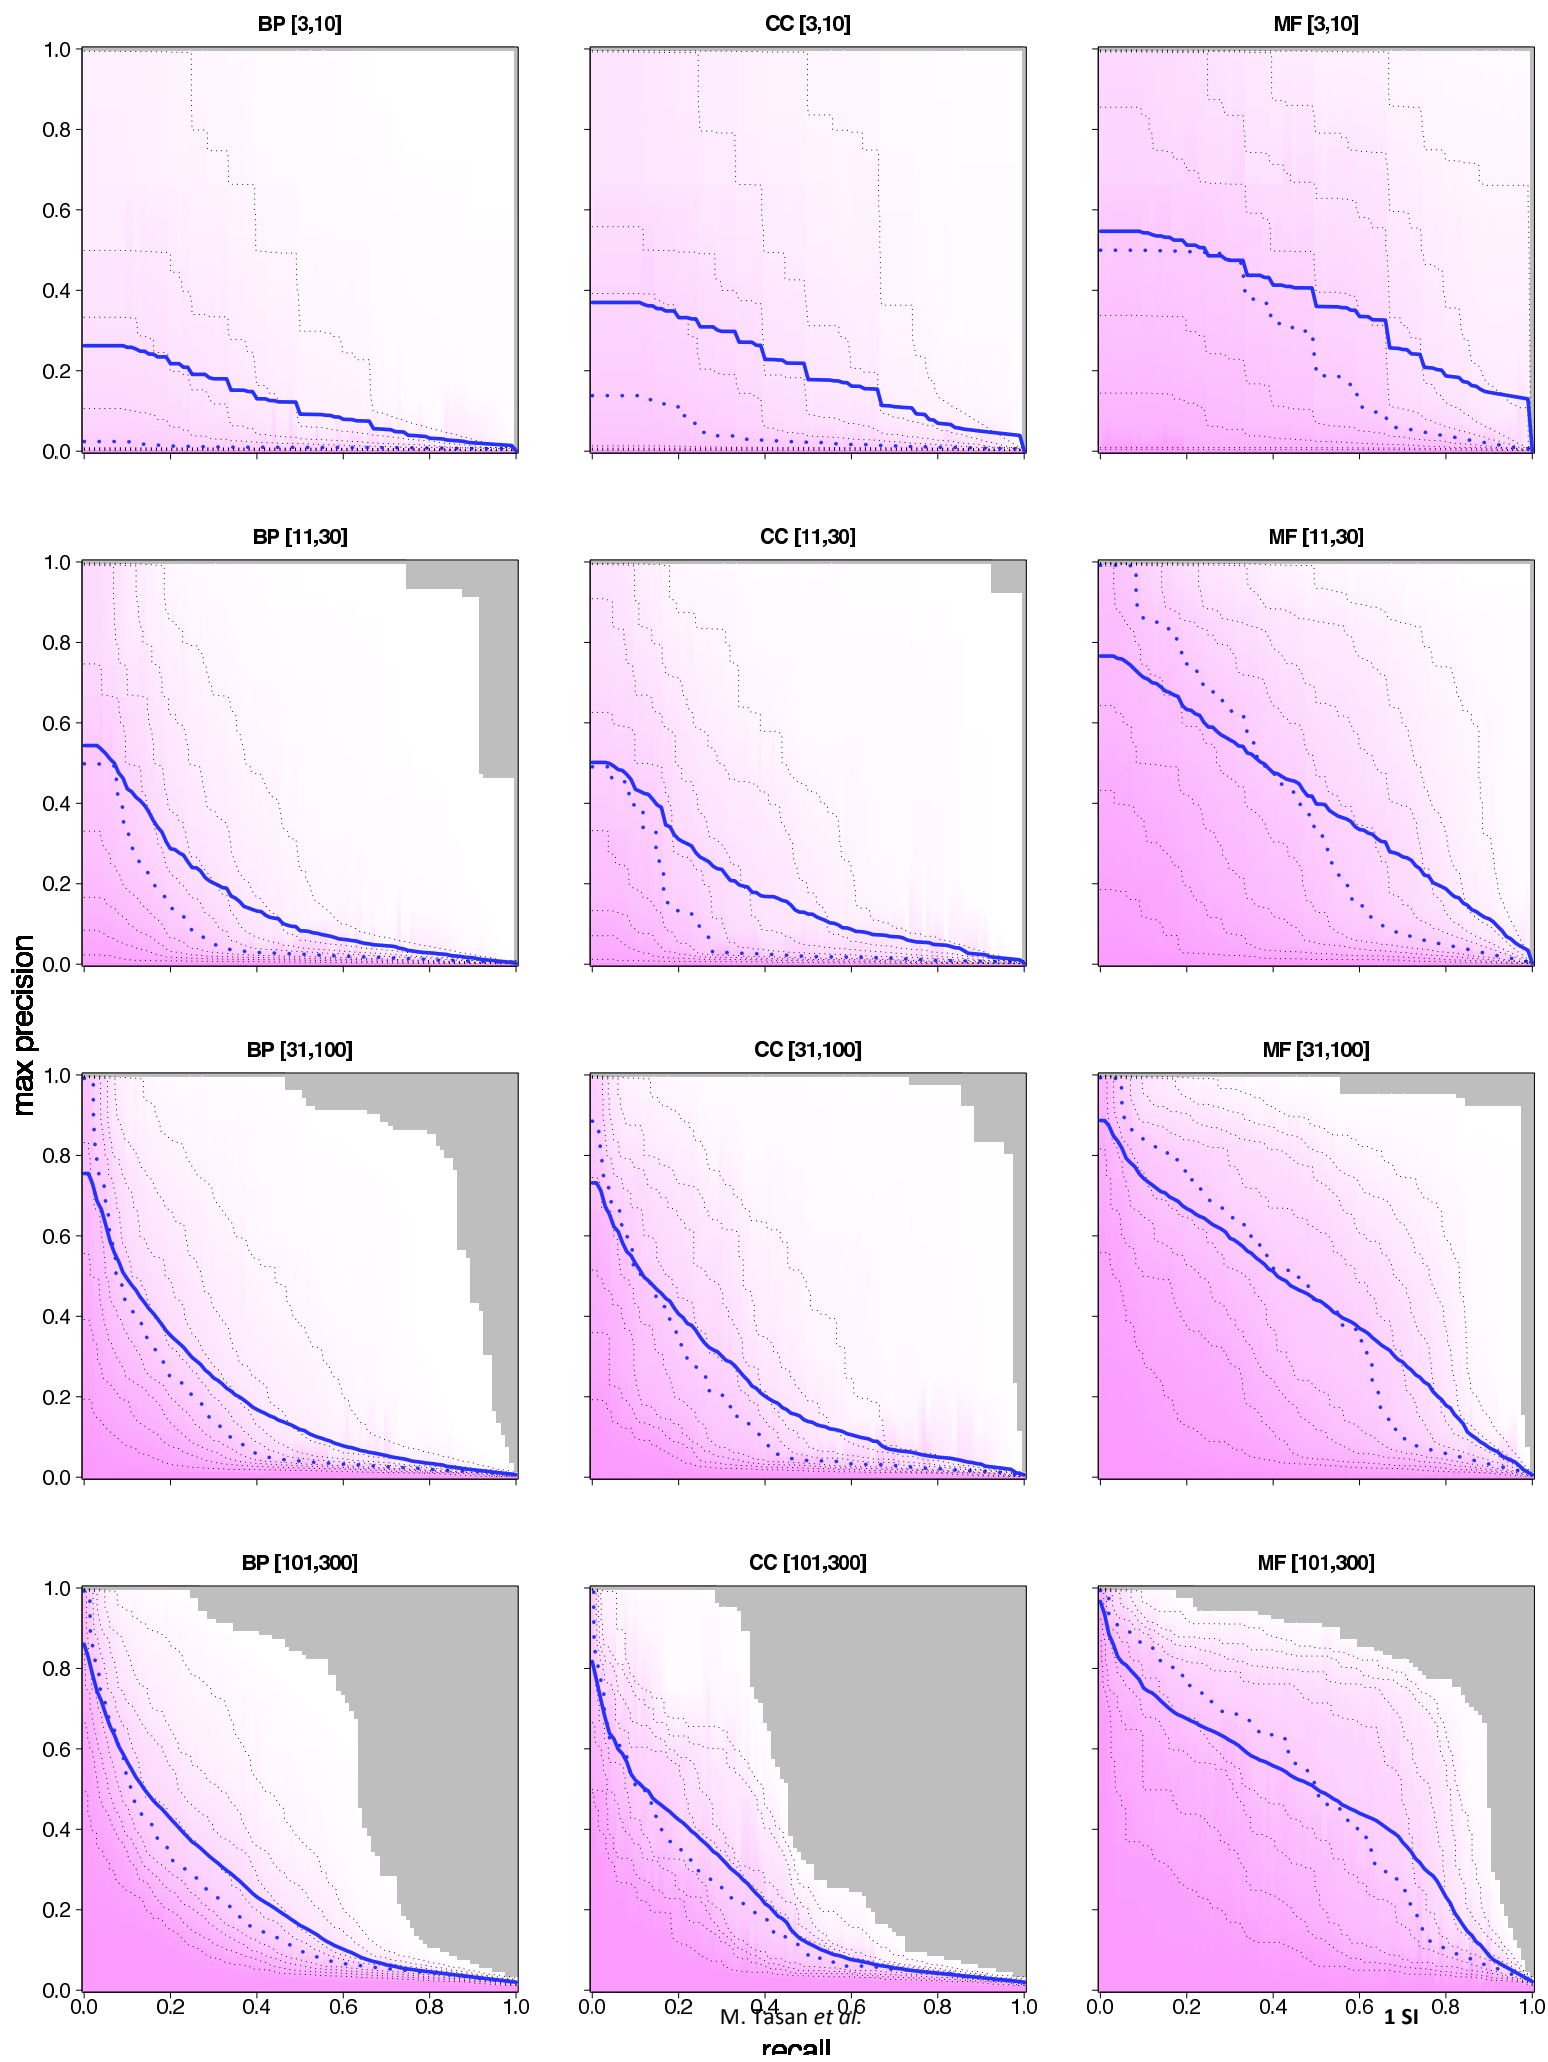

**Figure S1** Aggregated GBP performance for each of the twelve GO term categories. Dashed lines indicate each 10% contour, heavy dashed line is median (50%), heavy blue solid line is mean performance. Contours indicate what fraction of classifiers in the evaluation category exceeded the shown performance. Gray area exceeds performance of all classifiers.



**Figure S2** Aggregated GBA performance for each of the twelve GO term categories. Dashed lines indicate each 10% contour, heavy dashed line is median (50% contour), heavy solid line is mean performance. Contours indicate what fraction of classifiers in the evaluation category exceeded the shown performance. Gray area exceeds performance of all classifiers.

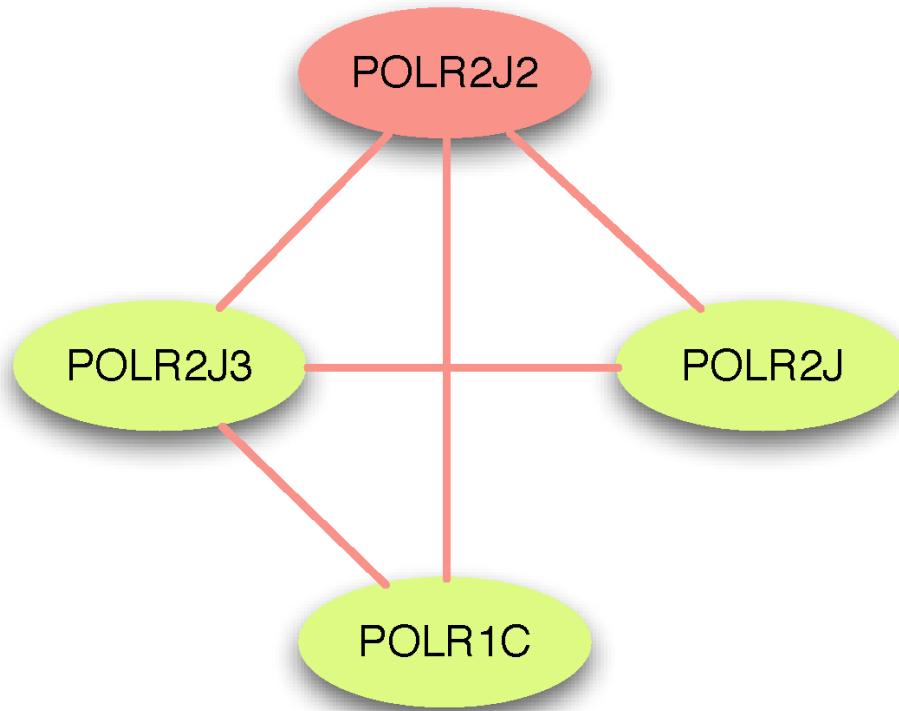

**Figure S3** Network identified using 1 seed gene (in red) and the top 0.1% of edges from the BP [3, 30] FLN.

BH-FDR  
normal brain  
glioblastoma  
△

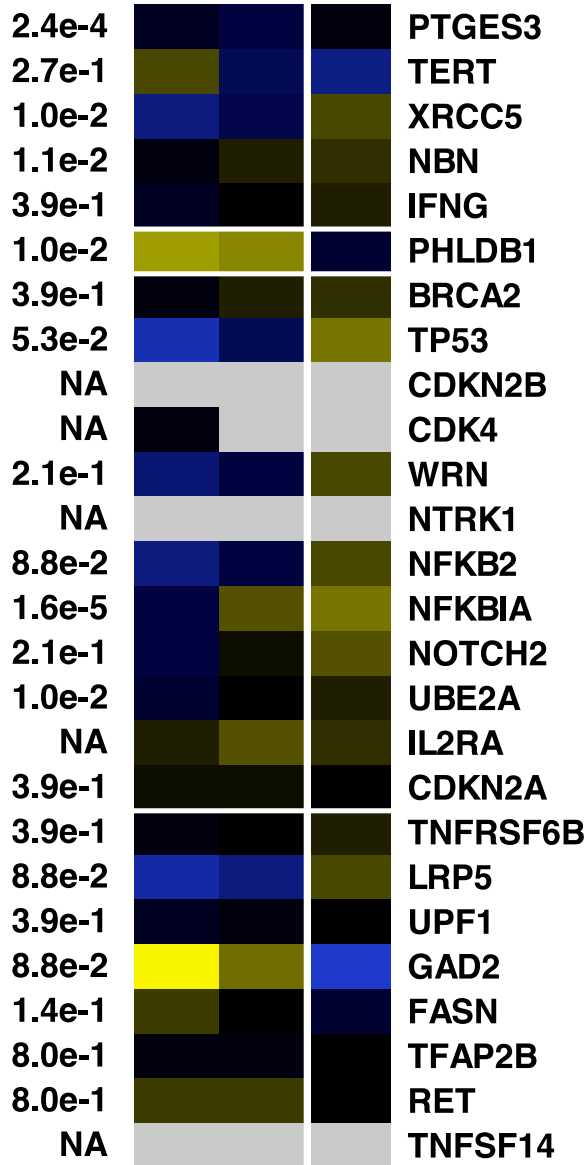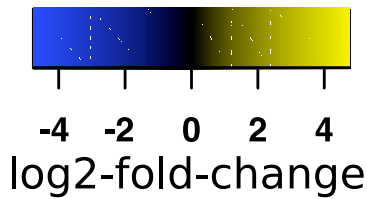

**Figure S4** 26 glioma network genes' mean microarray values in normal brain and glioblastomas (from NCBI's GEO dataset GDS1819 and ref. [8]). Test statistics computed using Welch's two-sample t-test with FDR adjustments for multiple testing.
