# Supplementary material for: A Resource of Quantitative Functional Annotation for Homo sapiens Genes
Source: PubMed Central journal article supplement (PMC3284330; doi:10.1534/g3.111.000828), 2012-02-01
Supplement: supp_2.2.223_FigureS1.pdf [file supp_2.2.223_FigureS1.pdf]

**BP [3,10]**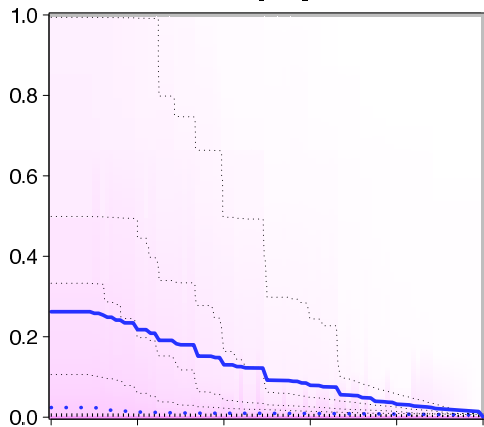**CC [3,10]**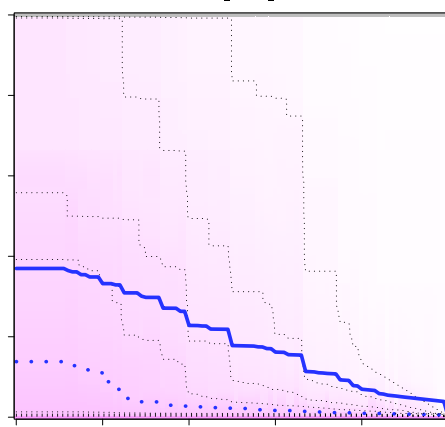**MF [3,10]**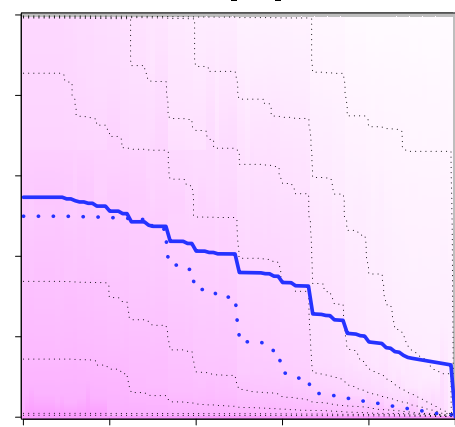**BP [11,30]**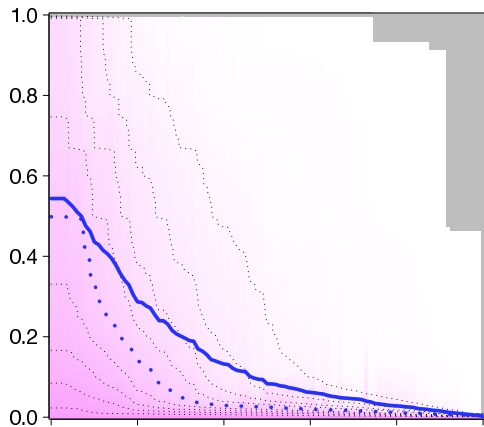**CC [11,30]**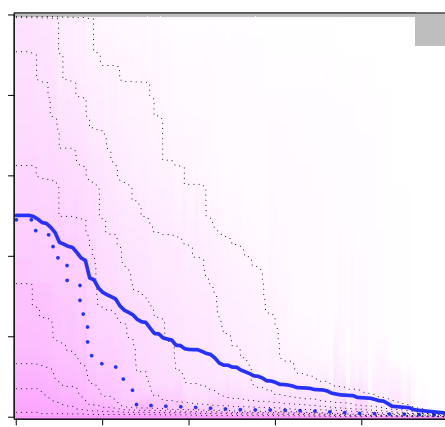**MF [11,30]**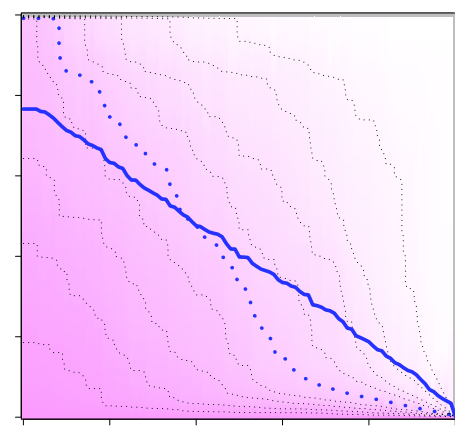**BP [31,100]**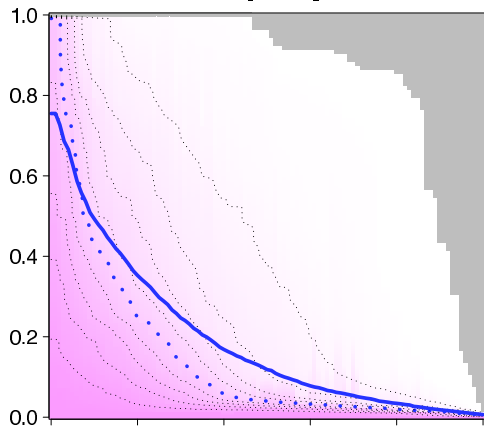**CC [31,100]**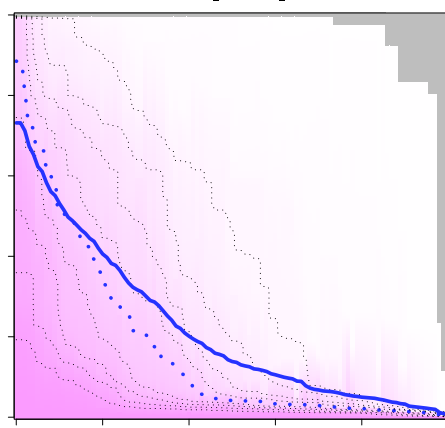**MF [31,100]**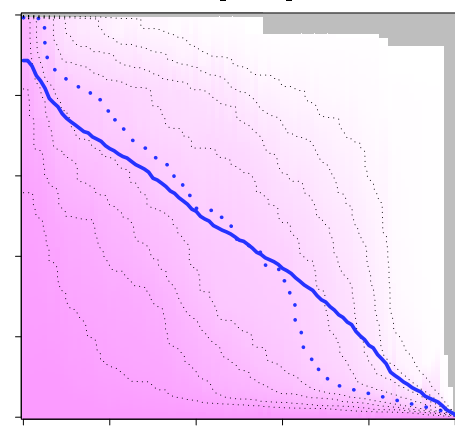**BP [101,300]**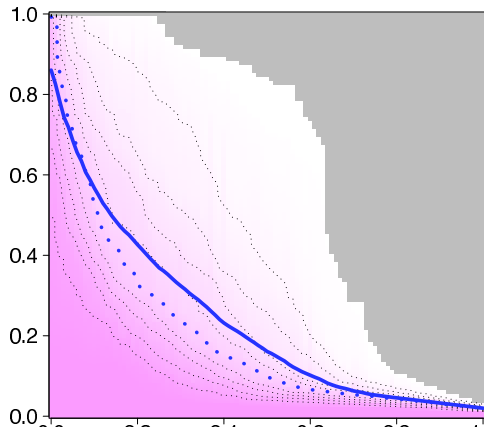**CC [101,300]**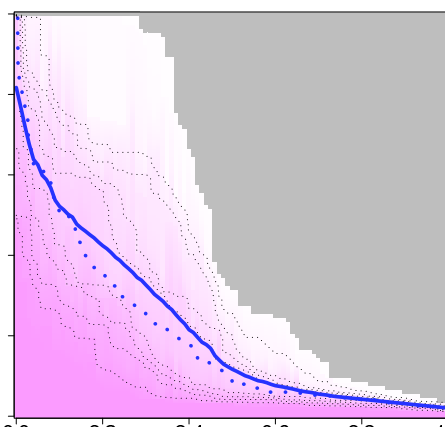**MF [101,300]**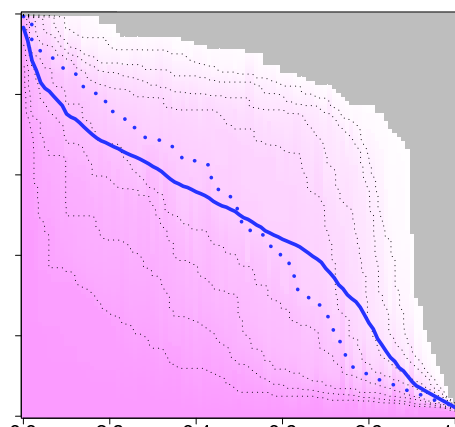

max precision

M. Hasan et al.

recall

1 si

**Figure S1** Aggregated GBP performance for each of the twelve GO term categories. Dashed lines indicate each 10% contour, heavy dashed line is median (50%), heavy blue solid line is mean performance. Contours indicate what fraction of classifiers in the evaluation category exceeded the shown performance. Gray area exceeds performance of all classifiers.
