# Supplementary material for: A Resource of Quantitative Functional Annotation for Homo sapiens Genes
Source: PubMed Central journal article supplement (PMC3284330; doi:10.1534/g3.111.000828), 2012-02-01
Supplement: supp_2.2.223_FigureS2.pdf [file supp_2.2.223_FigureS2.pdf]

**Figure S2** Aggregated GBA performance for each of the twelve GO term categories. Dashed lines indicate each 10% contour, heavy dashed line is median (50% contour), heavy solid line is mean performance. Contours indicate what fraction of classifiers in the evaluation category exceeded the shown performance. Gray area exceeds performance of all classifiers.
