# Supplementary material for: A Resource of Quantitative Functional Annotation for Homo sapiens Genes
Source: PubMed Central journal article supplement (PMC3284330; doi:10.1534/g3.111.000828), 2012-02-01
Supplement: supp_2.2.223_FigureS3.pdf [file supp_2.2.223_FigureS3.pdf]

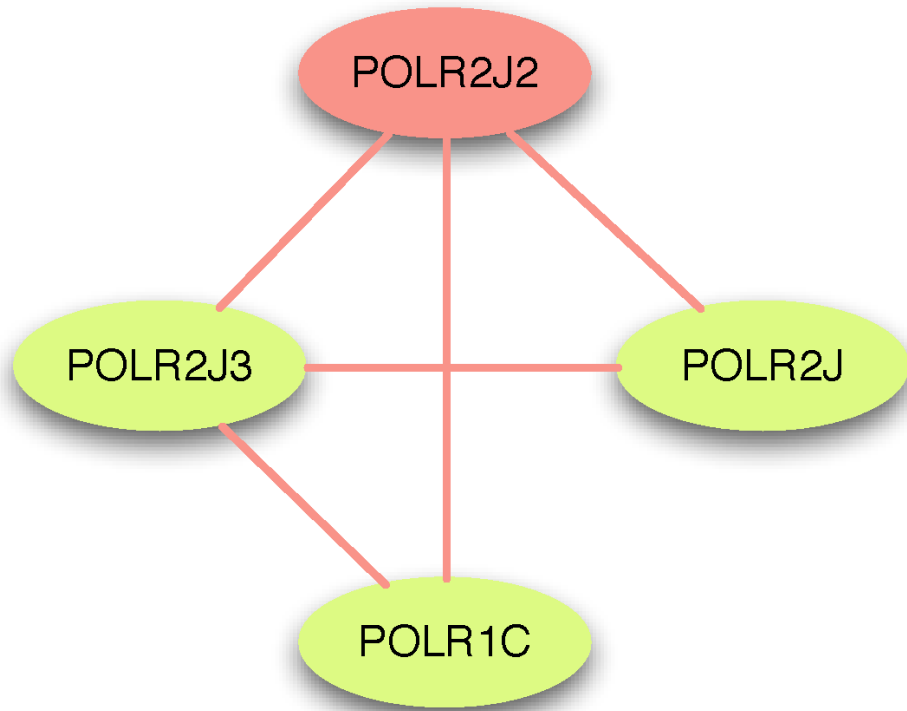

**Figure S3** Network identified using 1 seed gene (in red) and the top 0.1% of edges from the BP [3, 30] FLN.
