# Supplementary material for: A Resource of Quantitative Functional Annotation for Homo sapiens Genes
Source: PubMed Central journal article supplement (PMC3284330; doi:10.1534/g3.111.000828), 2012-02-01
Supplement: supp_2.2.223_FigureS4.pdf [file supp_2.2.223_FigureS4.pdf]

BH-FDR  
normal brain  
glioblastoma  
Δ

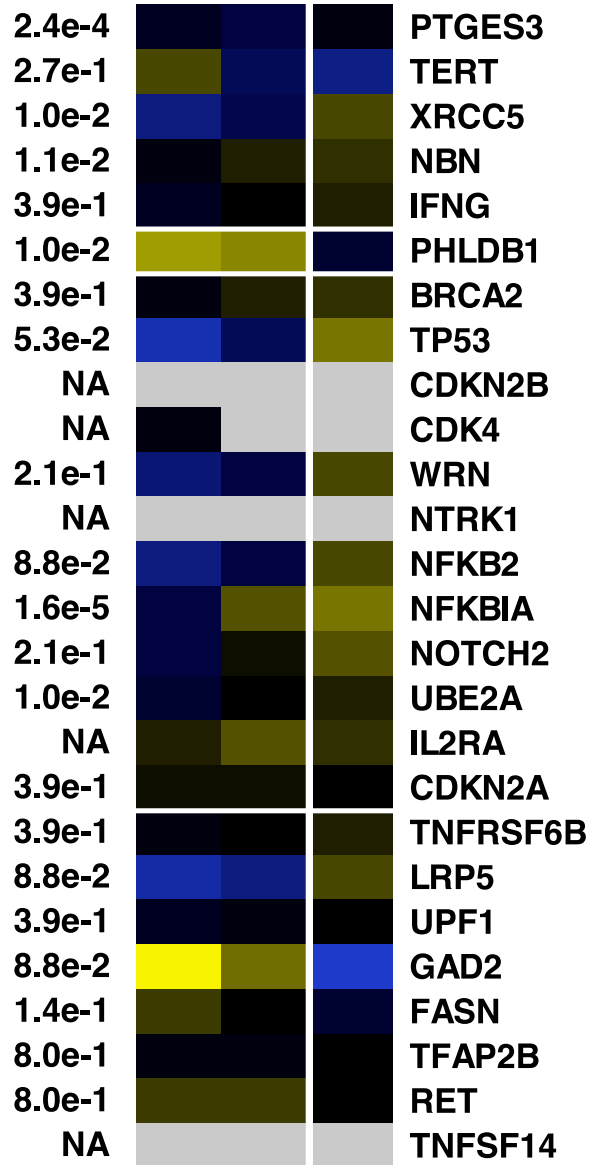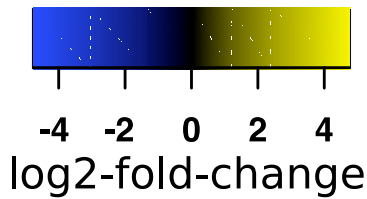

**Figure S4** 26 glioma network genes' mean microarray values in normal brain and glioblastomas (from NCBI's GEO dataset GDS1819 and ref. [8]). Test statistics computed using Welch's two-sample t-test with FDR adjustments for multiple testing.
